# Supplementary material
Source: Springer Nature journal article supplement (https://www.springermedizin.de/resource/supplementary/13014_2007_118_MOESM4_ESM.pdf/9632946)

## Restaging of colorectal cancer

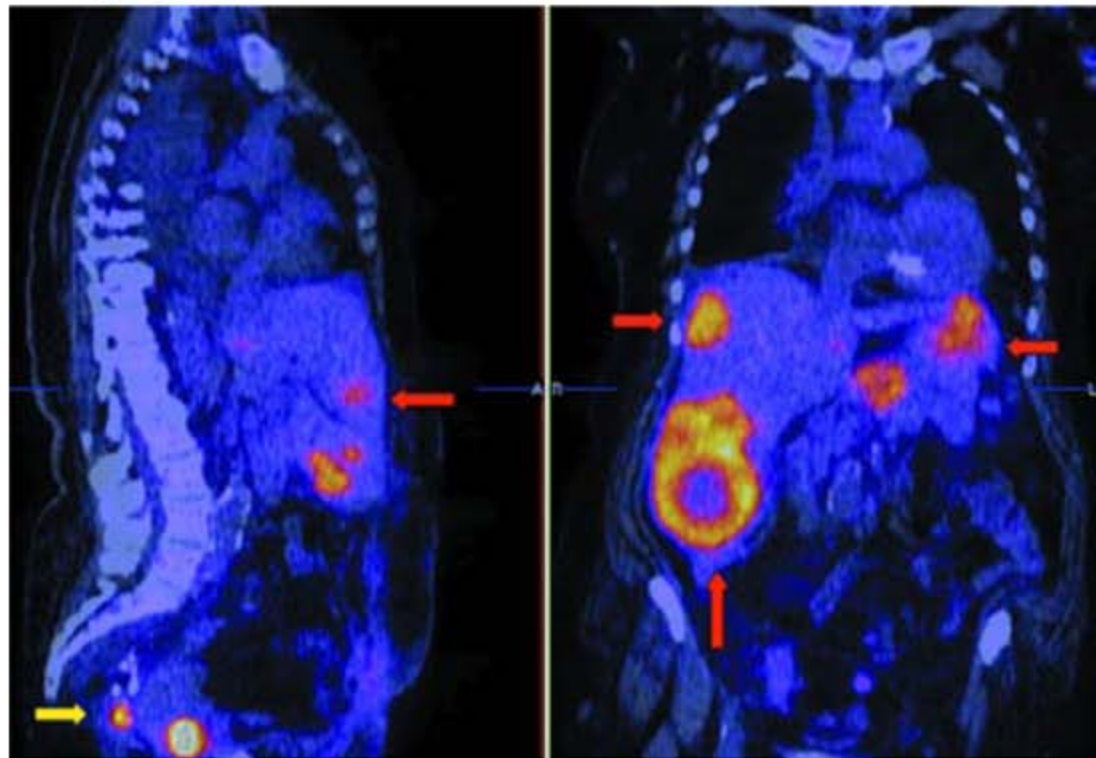

Supplement: MOESM4 [file 9632946]
